# Supplementary material
Source: PubMed Central journal article supplement (PMC4187769)
Supplement: JCM.01502-14_zjm999093729so2.pdf [file JCM.01502-14_zjm999093729so2.pdf]

Supplemental Table. Characteristics of gonococcal isolates used in this study.

| Isolate ID | Sequence <sup>A</sup><br>type | Clonal <sup>B</sup><br>complex | Geographic location | Year of isolation | Patient     | Site of infection |
|------------|-------------------------------|--------------------------------|---------------------|-------------------|-------------|-------------------|
|            |                               |                                |                     |                   | Sex (Age)   |                   |
| SK 17973   | ST 1                          | CC 1                           | Saskatoon           | 2006              | Female (19) | Genital           |
| SK 16942   | ST 1                          | CC 1                           | Regina              | 2005              | Male (23)   | Urethra           |
| SK 29471   | ST 1                          | CC 1                           | Saskatoon           | 2005              | Male (34)   | Urethra           |
| SK 28355   | ST 17                         | CC 1                           | Laloche             | 2007              | Male (28)   | Urethra           |
| SK 14515   | ST 28                         | CC 1                           | Canora              | 2005              | Female (14) | Vagina            |
| SK 16259   | ST 8                          | CC 1                           | Saskatoon           | 2007              | Male (31)   | Urethra           |
| SK 12684   | ST 23                         | CC 1                           | Prince Albert       | 2006              | Female (42) | Cervix            |
| SK 29344   | ST 3                          | CC 2                           | Yorkton             | 2007              | Female (14) | Cervix            |
| SK 6987    | ST 3                          | CC 2                           | Prince Albert       | 2006              | Male (16)   | Urethra           |
| SK 25532   | ST 3                          | CC 2                           | Saskatoon           | 2005              | Male (46)   | Urethra           |
| SK 7842    | ST 22                         | CC 2                           | Laloche             | 2006              | Female (16) | Cervix            |
| SK 708     | ST 2                          |                                | Saskatoon           | 2006              | Female (19) | Cervix            |
| SK 8976    | ST 5                          |                                | Prince Albert       | 2006              | Male (35)   | Urethra           |
| SK 33414   | ST 16                         |                                | La Ronge            | 2007              | Male (29)   | Penis             |
| SK 23020   | ST 26                         |                                | Regina              | 2006              | Female (24) | Bartholin's cyst  |
| SK 36809   | ST 12                         |                                | Prince Albert       | 2007              | Male (24)   | Urethra           |
| SK 13777   | ST 29                         |                                | Regina              | 2005              | Female (20) | Cervix            |
| SK 32402   | ST 6                          |                                | Lloydminster        | 2007              | Female (35) | Cervix            |
| SK 1902    | ST 20                         |                                | Saskatoon           | 2006              | Male (24)   | Penis             |
| SK 7461    | ST 9                          |                                | Regina              | 2008              | Female (31) | Cervix            |
| SK 22871   | ST 11                         |                                | Saskatoon           | 2007              | Male (47)   | Urethra           |
| SK 15454   | ST 4                          |                                | Saskatoon           | 2007              | Female (39) | Vagina            |
| SK 39420   | ST 4                          |                                | Regina              | 2008              | Male (22)   | Eye               |
| CH 811     |                               |                                | Chile               | 1983              |             |                   |
| GC1 182    |                               |                                | USA                 | 1960'             |             |                   |

<sup>A</sup> Sequence types of the gonococcal isolates were determined previously (1).

<sup>B</sup> Circulating strain ST 1 and its single locus variants (SLVs); ST 17, ST 28, ST 8 and ST 23 as well as circulating strain ST 3 and its SLV ST 22 formed two clonal complexes (CCs), CC 1 and CC 2, while other gonococcal strains showed no evidence of clonality.

## Reference

1. **Vidovic S, Thakur SD, Horsman GB, Levett PN, Anvari V, Dillon JR.** 2012. Longitudinal analysis of the evolution and dissemination of *Neisseria gonorrhoeae* strains (Saskatchewan, Canada 2005–2008) reveals three major circulating strains and convergent evolution of ciprofloxacin and azithromycin resistance. *J. Clin. Microbiol.* **50**: 3823–3830.
